# Supplementary material for: Nomilin from Yuzu Seed Has In Vitro Antioxidant Activity and Downregulates Melanogenesis in B16F10 Melanoma Cells through the PKA/CREB Signaling Pathway
Source: MDPI journal article supplement (doi:10.3390/antiox11091636), 2022-08-23
Supplement: s1 [file s1]

## Supplementary data

# Nomilin Isolated from Yuzu Seed Shows *In Vitro* Antioxidant Activity and Downregulates Melanogenesis in B16F10 Melanoma Cells via PKA/CREB Signaling Pathway

Moon-Hee Choi <sup>1</sup>, Seung-Hwa Yang <sup>2</sup>, Nam Doo Kim <sup>3</sup> and Hyun-Jae Shin <sup>1,2,\*</sup>

## Table captions

**Table S1** HPLC analysis conditions used for identification of limonoid aglycone and limonoid glucoside

**Table S2** Phenolic compounds identified in limonoid aglycone extracts quantified by HPLC

**Table S3** Phenolic compounds identified in limonoid glucoside extracts quantified by HPLC

## Figure captions

**Figure S1.** <sup>1</sup>H-NMR spectrum of nomilin.

**Figure S2.** <sup>13</sup>C-NMR spectrum of nomilin.

**Figure S3.** Antioxidant activity profiles of LA1, LA2, LA3, LG1, LG2, and LG3. (a) DPPH radical scavenging activity and (b) ABTS radical scavenging activity.

**Figure S4.** HPLC chromatogram of the limonoid aglycone (LA1, LA2, LA3) and limonoid glucoside (LG1, LG2, LG3) using diode-array detection at 220 nm. (a) LA1; (b) LA2; (c) LA3; (d) standard mixture (1: limonin, 2: nomilin); (e) LG1; (f) LG2; (g) LG3; (h) standard mixture (1: chlorogenic acid, 2: caffeic acid, 3: rutin, 4: p-coumaric acid, 5: naringin, 6: hesperidin, 7: luteolin, 8: linoleic acid).

## Supplementary Tables

**Table S1** HPLC analysis conditions used for identification of limonoid aglycone and limonoid glucoside

|                      | Limonid Aglycone                                         | Limonoid Glucoside                    |
|----------------------|----------------------------------------------------------|---------------------------------------|
| Column               | Shim-Pack GIS-ODS C18 column (4.6 x 250mm, 5 $\mu$ m)    | Xbridge C18 (4.6 x 150 mm, 5 $\mu$ m) |
| Flow rate            | 0.7 mL/min                                               | 1.0 mL/min                            |
| Solvent A            | Water (in 0.01% phosphoric acid)                         | Water (in 0.01% phosphoric acid)      |
| Solvent B            | Acetonitrile (in 0.01% phosphoric acid)                  | Methanol (in 0.01% phosphoric acid)   |
| Mobile phase         | 0-40 min 20-60% B, 40-50 min 60-100% B, 50-60 min 100% B | 0-50 min 20-70% B                     |
| Time                 | 60 min                                                   | 50 min                                |
| Temperature          | 30 °C                                                    | R. T.                                 |
| Detection wavelenght | 210 nm                                                   | 220 nm                                |
| Injection volume     | 20 $\mu$ L                                               | 20 $\mu$ L                            |

**Table S2** Phenolic compounds identified in limonoid aglycone extracts quantified by HPLC

| No. | Standard | LA1        | LA2        | LA3         |
|-----|----------|------------|------------|-------------|
| 1   | Limonin  | 641.4 mg/g | 315.5 mg/g | 595.1 mg/g  |
| 2   | Nomilin  | 538.7 mg/g | 690.7 mg/g | 1725.8 mg/g |

**Table S3** Phenolic compounds identified in limonoid glucoside extracts quantified by HPLC

| No. | Standard         | LG1         | LG2         | LG3        |
|-----|------------------|-------------|-------------|------------|
| 1   | Chlorogenic acid | 409.35 mg/g | 132.18 mg/g | 8.34 mg/g  |
| 2   | Caffeic acid     | 0.00 mg/g   | 0.00 mg/g   | 0.00 mg/g  |
| 3   | Rutin            | 0.00 mg/g   | 142.22 mg/g | 3.99 mg/g  |
| 4   | p-Coumaric acid  | 39.24 mg/g  | 103.22 mg/g | 5.96 mg/g  |
| 5   | Naringin         | 430.17 mg/g | 292.19 mg/g | 48.87 mg/g |
| 6   | Hesperidin       | 436.76 mg/g | 188.22 mg/g | 7.52 mg/g  |
| 7   | Luteolin         | 13.66 mg/g  | 28.61 mg/g  | 0.90 mg/g  |
| 8   | Linoleic acid    | 3.52 mg/g   | 2.73 mg/g   | 34.65 mg/g |

## Supplementary Figures

Figure S1.

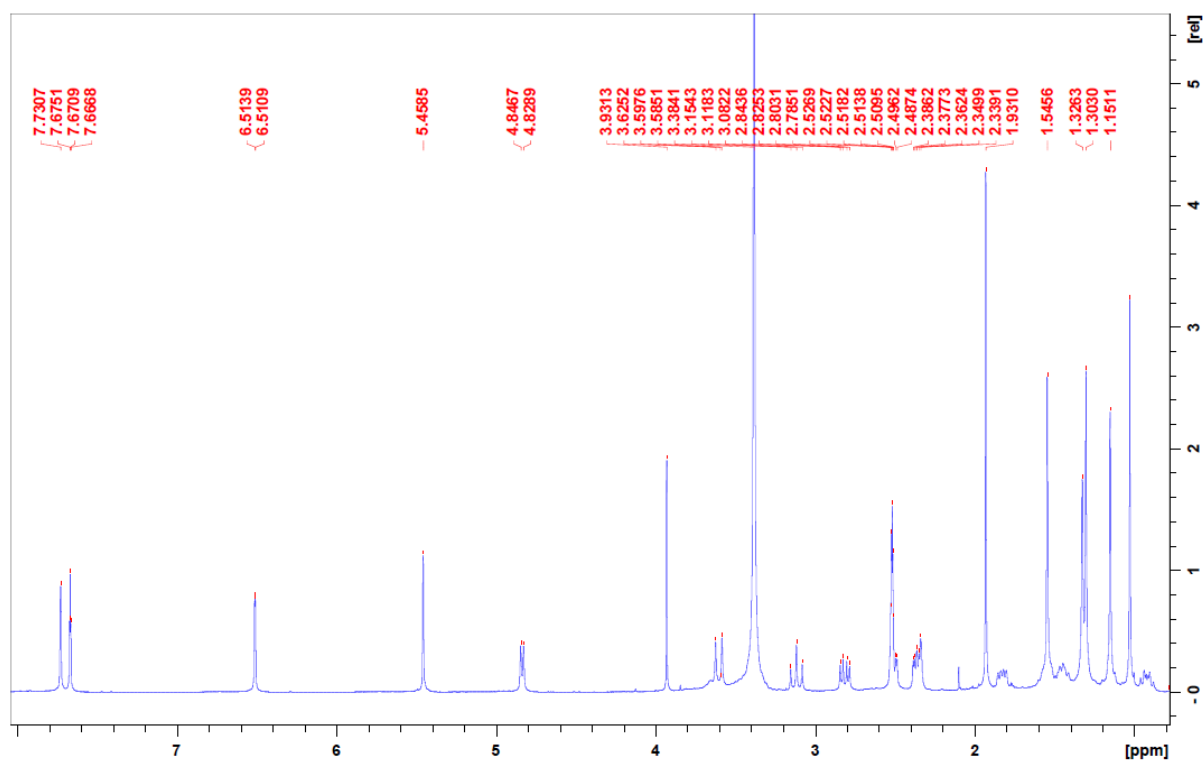

Figure S1. <sup>1</sup>H-NMR spectrum of nomilin.

**Figure S2.**

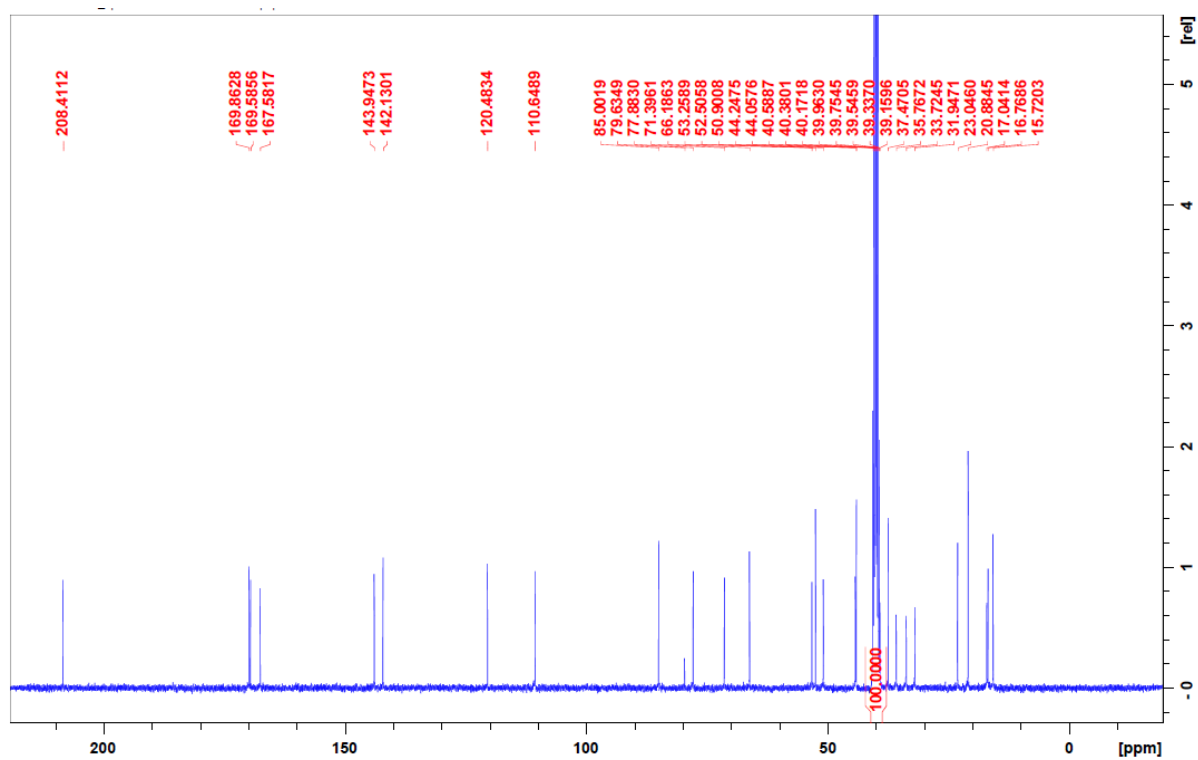

**Figure S2.**  $^{13}\text{C}$ -NMR spectrum of nomilin.

**Figure S3.**

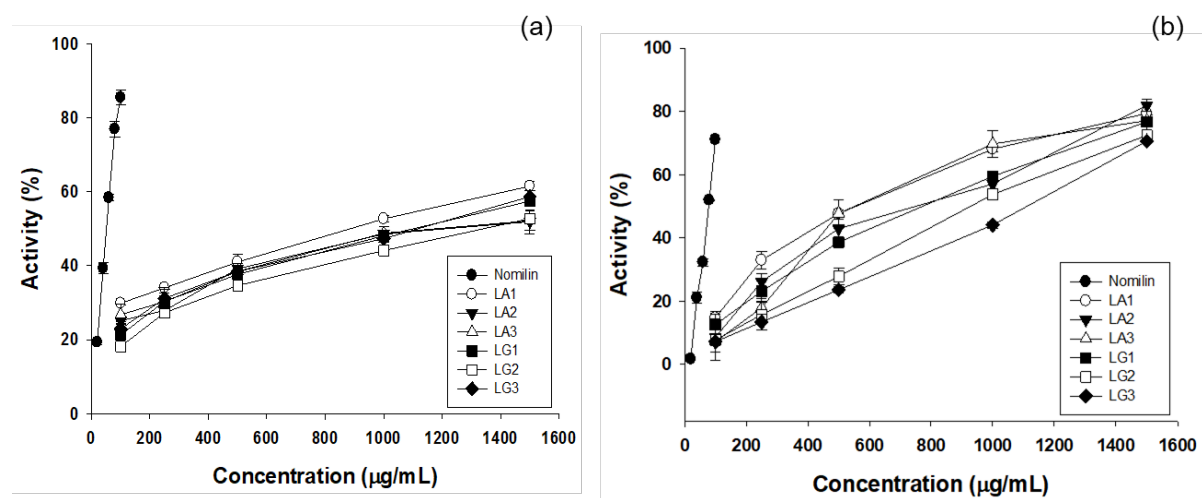

**Figure S3.** Antioxidant activity profiles of LA1, LA2, LA3, LG1, LG2, and LG3. (a) DPPH radical scavenging activity and (b) ABTS radical scavenging activity.

**Figure S4.**

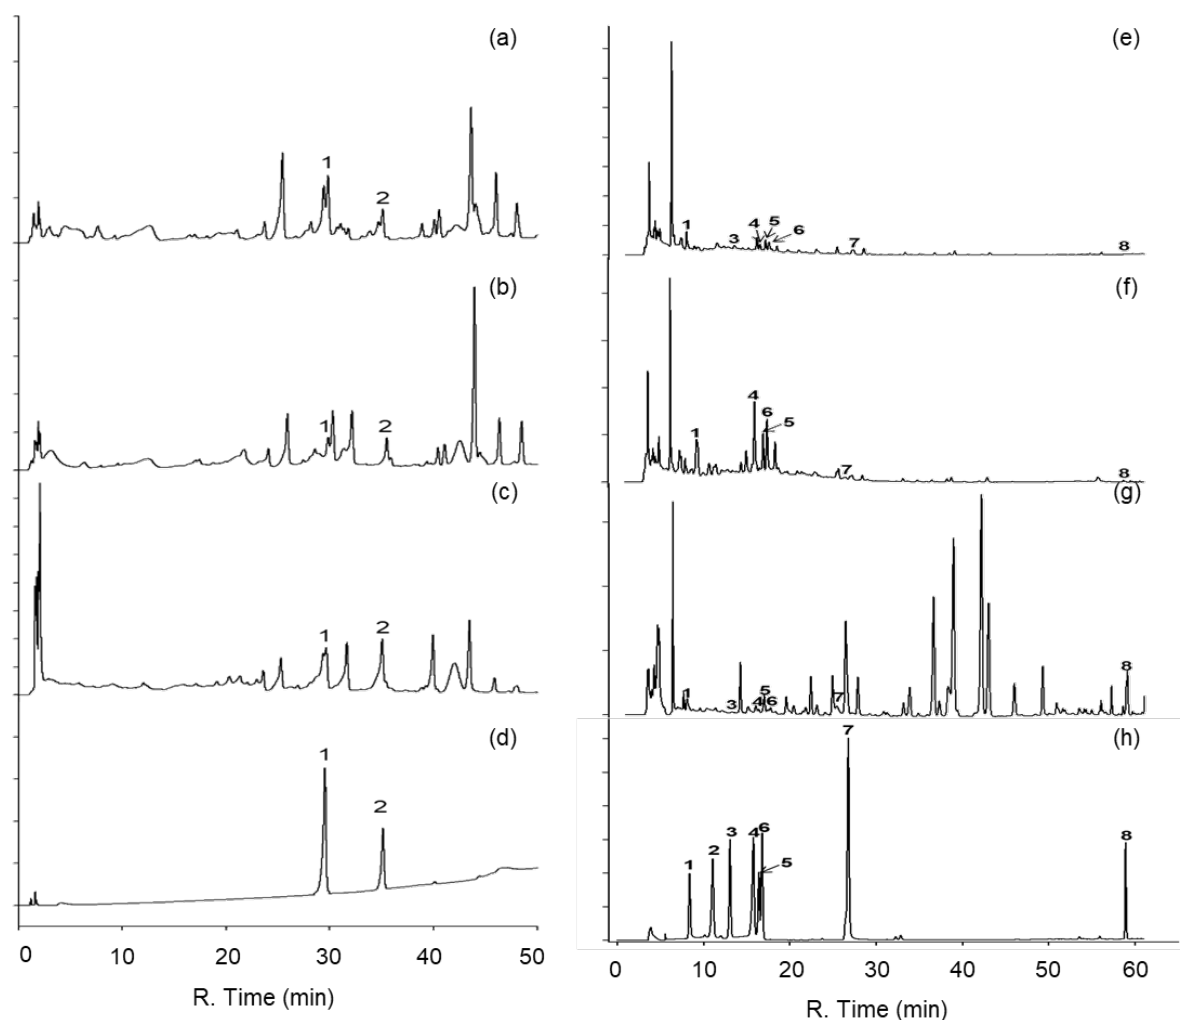

**Figure S4.** HPLC chromatogram of the limonoid aglycone (LA1, LA2, LA3) and limonoid glucoside (LG1, LG2, LG3) using diode-array detection at 220 nm. (a) LA1; (b) LA2; (c) LA3; (d) standard mixture (1: limonin, 2: nomilin); (e) LG1; (f) LG2; (g) LG3; (h) standard mixture (1: chlorogenic acid, 2: caffeic acid, 3: rutin, 4: p-coumaric acid, 5: naringin, 6: hesperidin, 7: luteolin, 8: linoleic acid).
